# Supplementary material for: Soap- and metal-free polystyrene latex particles as a nanoplastic model
Source: Royal Society of Chemistry journal article supplement (doi:10.1039/c9en00384c), 2019-01-01
Supplement: c9en00384c1.pdf [file c9en00384c1.pdf]

## Supporting information

### Soap and metal-free polystyrene latex particle as nanoplastic model

Laurence Pessoni<sup>1</sup>, Cloé Veclin<sup>1</sup>, Hind El Hadri<sup>1</sup>, Cyril Cugnet<sup>1</sup>, Mélanie Davranche<sup>2</sup>, Anne-Catherine Pierson-Wickmann<sup>2</sup>, Julien Gigault<sup>2\*</sup>, Bruno Grassl<sup>1\*</sup> and Stéphanie Reynaud<sup>1</sup>

- 1- CNRS/ Univ Pau & Pays Adour/ E2S UPPA, Institut des sciences analytiques et de physicochimie pour l'environnement et les matériaux, UMR 5254, 64000, Pau, France
- 2- Géosciences Rennes, UMR 6118, CNRS – Université de Rennes 1, Av. Général Leclerc, Campus de Beaulieu, 35000 Rennes France

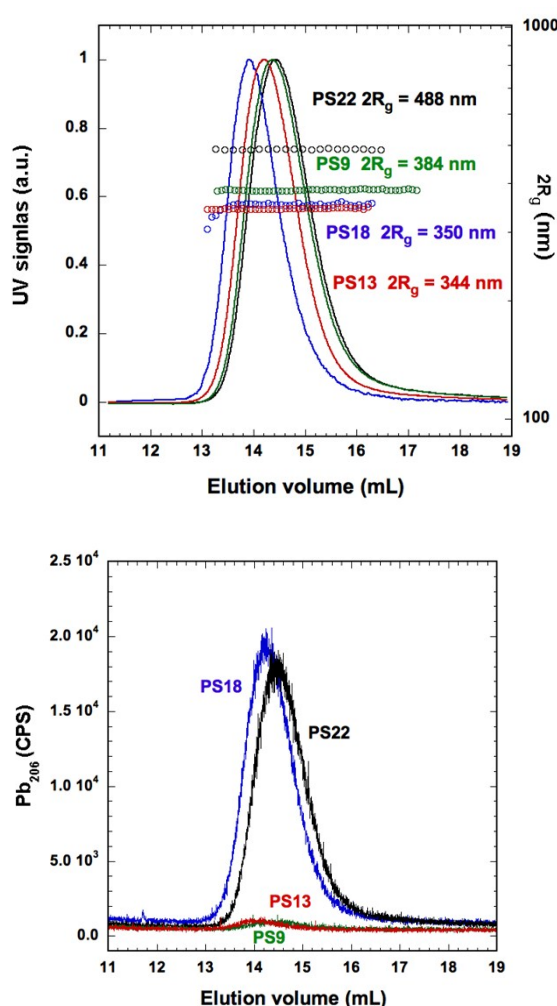

FIGURE S1: AF4 characterization ; in green PS9, in red PS13, in blue PS18 and in black PS22 (see experimental section).

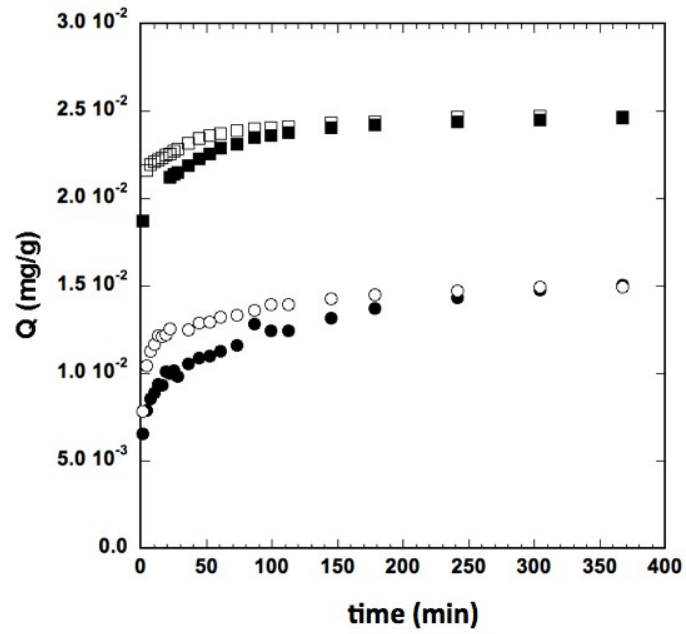

Figure S2: electrochemical adsorption kinetics by SWASV according to the conditions given in Table 2. empty square, PS18, full square, PS22, empty circle, PS9, full circle, PS13.

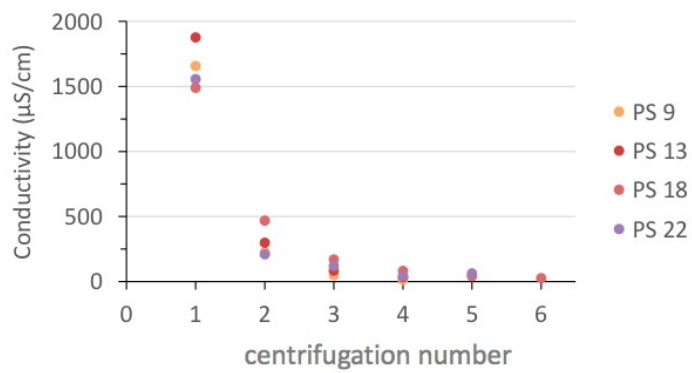

FIGURE S3 : Conductivity of supernatants of all steps of purification
